# Supplementary material
Source: Research Square preprint supplement (doi:10.21203/rs.3.rs-9573628/v1)

**Graphical abstract:**

| **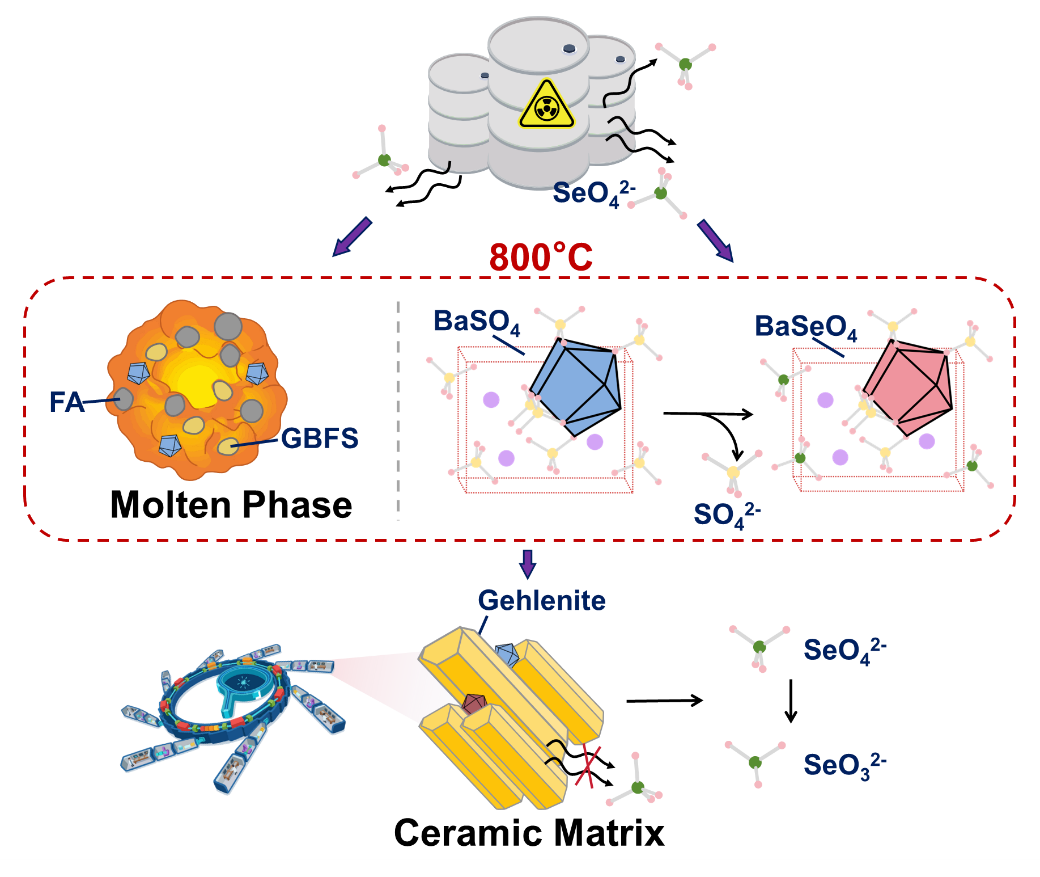** |
| --- |

Supplement: Supplementary file 1 [file 1c278e38743de3de4a4ea2a8.docx]
